# Supplementary material
Source: bioRxiv or medRxiv preprint supplement (https://www.biorxiv.org/highwire/filestream/124137/field_highwire_adjunct_files/0/410563-1.pdf)
Supplement: Supplementary file [file 410563-1.pdf]

# Evolution of gastrulation in cavefish: heterochronic cell movements and maternal factors

Jorge Torres-Paz, Julien Leclercq and Sylvie Rétaux

Supplemental figures

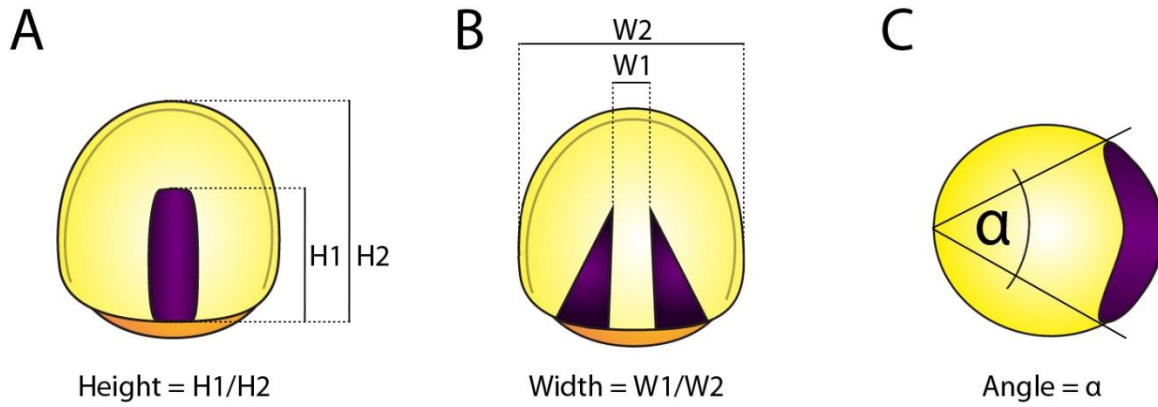

**Supplemental figure 1.- Illustrations of the measurements performed.**

(A) Height values correspond to the ratio between H1 (distance between the margin and the leading cell towards the animal pole) and H2 (distance from the margin to the animal pole extreme).

(B) Width values (or central gap) correspond to the ratio between W1 (distance between cells in lateral extremes or the length of the central gap) and W2 (total width of the embryo).

(C) Angles of expression ( $\alpha$ ) were measured in animal view using the borders of the expression domain (dorsally) to set the positions of the rays and the vertex was set at the opposite site to the center of the expression domain.

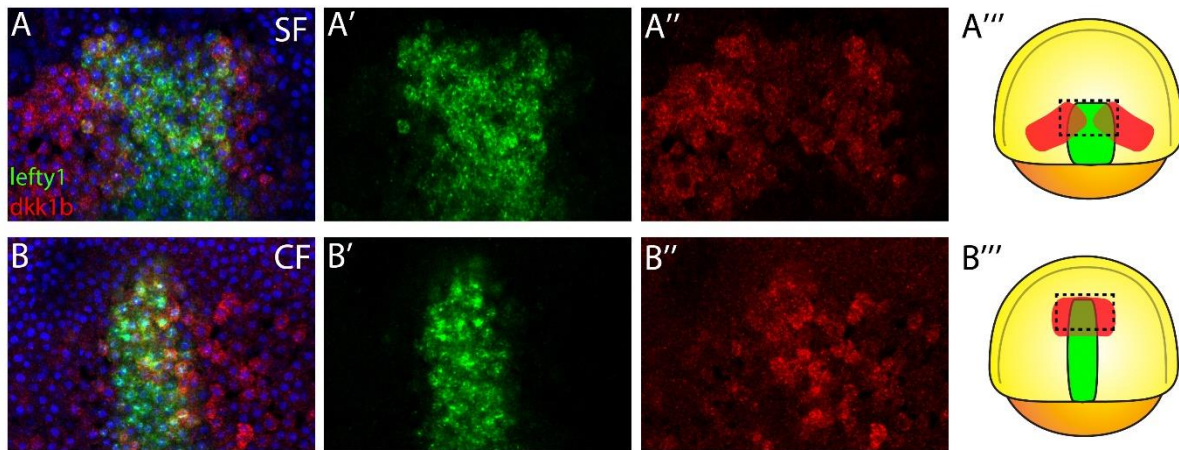

**Supplemental figure 2.- Partial co-expression of *dkk1b* (red) and *lefty1* (green) in the anterior prechordal plate at 70% epiboly.**

(A-B) Confocal section (3 $\mu$ m) showing the expression of *lefty1* (A', B') and *dkk1b* (A'' and B'') in surface fish (A-A'') and cavefish (B-B'') at 70% epiboly. DAPI was used as counterstain.

Illustrations of the complete surface fish (A''') and cavefish (B''') embryos, with *dkk1b* in red and *lefty1* in green. Black dashed lines show the regions of interest in A and B.

Embryos in dorsal view, animal pole upwards.

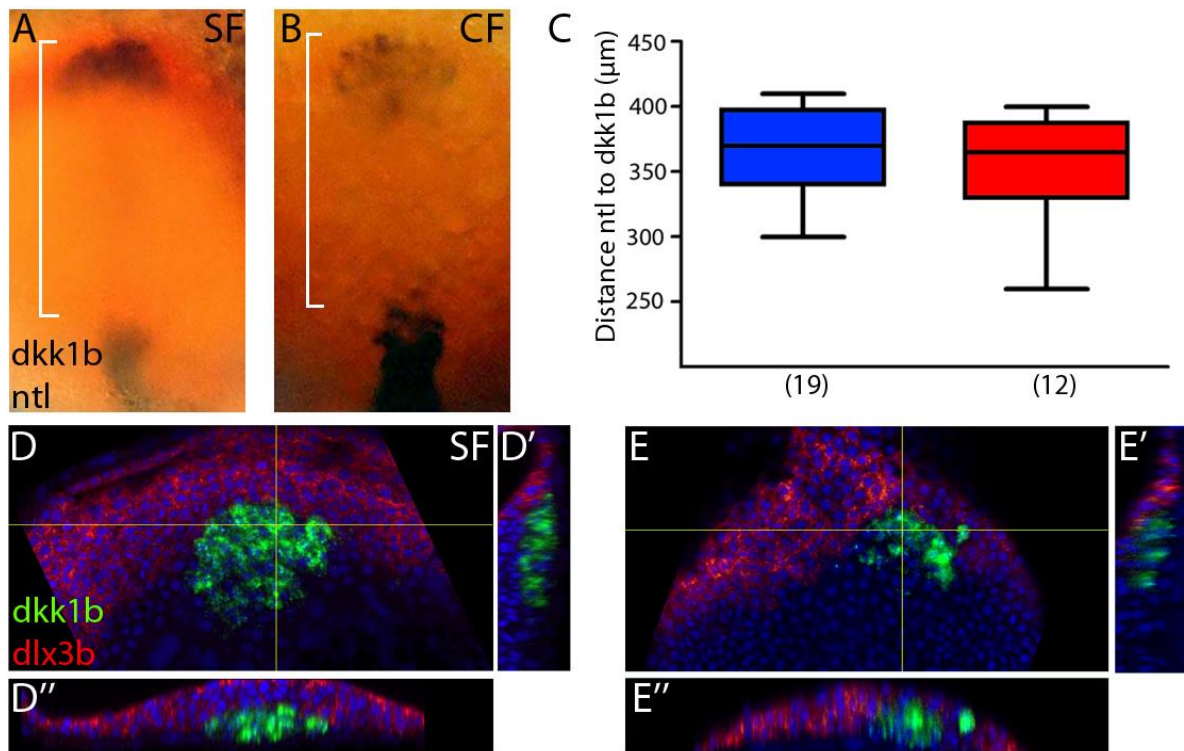

**Supplemental figure 3.- Comparison of the relative position of the prechordal plate in surface fish (SF) and cavefish (CF) at bud stage (10hpf).**

(A-B) Double ISH to *dkk1b* and *ntl* (dark blue) in surface fish (A) and cavefish (B). (C) Quantification of the distance between the anterior-most *dkk1b* expressing cell and the anterior-most *ntl* expressing cell (white brackets in A and B).

(D-E) Confocal sections (3μm) showing the expression of *dkk1b* (green) and *dlx3b* (red) in surface fish (D) and cavefish (E). Vertical lines indicate the level of the optical section showed in D' and E'. Horizontal lines indicate the level of the optical section showed in D'' and E''.

All embryos are flat mount, in dorsal view, anterior upwards.
